# Supplementary material for: Highly efficient formation of halodiazoacetates and their use in stereoselective synthesis of halocyclopropanes
Source: Royal Society of Chemistry journal article supplement (doi:10.1039/b814374a), 2008-01-01
Supplement: b814374a.pdf [file b814374a.pdf]

## General

All chemicals were used as delivered from Sigma-Aldrich.

Flash chromatography was done with an Isco Inc. CombiFlash Companion with silica gel from SdS (60, 40-63  $\mu\text{m}$ , 550  $\text{m}^2/\text{g}$ , pH 7). Eluents consisted of distilled technical grade ethyl acetate and hexane.

NMR spectra were recorded on a Bruker Avance DPX300 instrument at 300 MHz for  $^1\text{H}$ -NMR and 75 MHz for  $^{13}\text{C}$ -NMR at 25  $^\circ\text{C}$ . Chemical shift ( $\delta$ ) is given in ppm relative to the solvent  $\text{CDCl}_3$  (7.24 ppm for  $^1\text{H}$ -NMR, 77.0 ppm for  $^{13}\text{C}$ -NMR).  $^{13}\text{C}$ -NMR spectra are decoupled.  $^1\text{H}$ -,  $^{13}\text{C}$ -NMR and DEPT135 spectra were recorded for all compounds. Peak assignment in  $^1\text{H}$ - and  $^{13}\text{C}$ -NMR is based on information obtained from DEPT135, HMQC, and/or COSY experiments, depending on what was necessary in each case.

MS spectra were recorded on a VG Prospec sector instrument from Fissions Instruments at 70eV.

### General procedure for experiments shown in Table 3:

NBS (1.3 mmol) was added to a solution of EDA (1.0 mmol) and DBU (1.4 mmol) in  $\text{CH}_2\text{Cl}_2$  (5.0 mL) at 0  $^\circ\text{C}$ , and the reaction mixture was stirred for 5 min. The crude reaction mixture was washed with cold  $\text{Na}_2\text{S}_2\text{O}_3$  solution (aq, 20 %, 3 x 5 mL), dried with  $\text{MgSO}_4$  at 0  $^\circ\text{C}$  and passed quickly through a silica column using cold  $\text{CH}_2\text{Cl}_2$  as eluent. Toluene (10.0 mL) was added, and the  $\text{CH}_2\text{Cl}_2$  was removed *in vacuo* at 0  $^\circ\text{C}$ . Alkene (2.0 mmol) was then added at 0  $^\circ\text{C}$ , and the temperature was slowly increased to r. t. A solution of  $\text{Rh}_2(\text{esp})_2$  (0.01 mmol) in toluene (2.0 mL) was added, and the reaction mixture was stirred for 15 min at r. t. The solvent was evaporated *in vacuo*, and the crude product was purified by flash chromatography.

## Experimental data

For all cyclopropanes, NMR data are reported for the major diastereomer, and MS data are reported for the mixture of the two diastereomers.

### Ethyl diazobromoacetate (1)

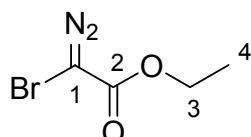

$^1\text{H-NMR}$  (300 MHz;  $\text{CDCl}_3$ ):  $\delta$  1.22-1.29 (t, 3H,  $J=7.1$  Hz, H4), 4.18-4.29 (q, 2H,  $J=7.1$  Hz, H3).

$^{13}\text{C-NMR}$  (75 MHz;  $\text{CDCl}_3$ ):  $\delta$  14.3 (C4), 62.5 (C3), 162.9 (C2).

### Ethyl diazochloroacetate (2)

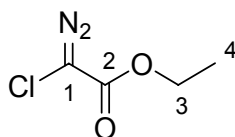

$^1\text{H-NMR}$  (300 MHz;  $\text{CDCl}_3$ ):  $\delta$  1.17-1.25 (t, 3H,  $J=7.1$  Hz, H4), 4.15-4.26 (q, 2H,  $J=7.1$  Hz, H3).

$^{13}\text{C-NMR}$  (75 MHz;  $\text{CDCl}_3$ ):  $\delta$  14.2 (C4), 62.2 (C3), 162.8 (C2).

### Ethyl diaziodoacetate (3)

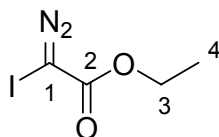

$^1\text{H-NMR}$  (300 MHz;  $\text{CDCl}_3$ ):  $\delta$  1.24-1.29 (t, 3H,  $J=7.1$  Hz, H4), 4.20-4.27 (q, 2H,  $J=7.1$  Hz, H3).

### Ethyl 1-bromo-2-phenylcyclopropanecarboxylate

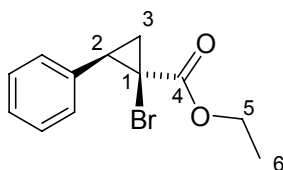

**<sup>1</sup>H-NMR (300 MHz; CDCl<sub>3</sub>):** δ 1.31-1.35 (t, 3H, *J*=7.1 Hz, H<sub>6</sub>), 1.77-1.82 (dd, 1H, *J*=8.7 Hz, *J*=6.0 Hz, H<sub>3β</sub>), 2.18-2.23 (dd, 1H, *J*=10.0 Hz, *J*=6.0 Hz, H<sub>3α</sub>), 2.93-2.99 (dd, 1H, *J*=10.0 Hz, *J*=8.7 Hz, H<sub>2</sub>), 4.22-4.30 (q, 2H, *J*=7.1 Hz, H<sub>5</sub>), 7.22-7.25 (m, 2H, Ar-H), 7.30-7.38 (m, 3H, Ar-H).

**<sup>13</sup>C-NMR (75 MHz; CDCl<sub>3</sub>):** δ 14.0 (C<sub>6</sub>), 23.7 (C<sub>3</sub>), 33.1 (C<sub>2</sub>), 35.2 (C<sub>1</sub>), 62.6 (C<sub>5</sub>), 127.4 (Ar-CH), 127.9 (Ar-CH), 129.3 (Ar-CH), 135.5 (Ar-C), 169.7 (C<sub>4</sub>).

**MS (EI) m/z (relative intensity):** 268/270 (3/3%, M<sup>+</sup>), 188 (12), 143 (15), 131 (23), 115 (100), 84 (34).

**HR-MS (ESI):** Found 268.0083, calcd. for C<sub>16</sub>H<sub>15</sub><sup>79</sup>BrO<sub>2</sub>: 268.0093 ppm (-3.9 ppm).

### Ethyl 1-chloro-2-phenylcyclopropanecarboxylate

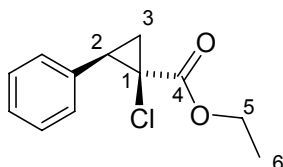

**<sup>1</sup>H-NMR (300 MHz; CDCl<sub>3</sub>):** δ 1.30-1.35 (t, 3H, *J*=7.1 Hz, H<sub>6</sub>), 1.71-1.76 (dd, 1H, *J*=8.7 Hz, *J*=6.0 Hz, H<sub>3β</sub>), 2.10-2.16 (dd, 1H, *J*=10.1 Hz, *J*=6.0 Hz, H<sub>3α</sub>), 3.03-3.09 (dd, 1H, *J*=10.1 Hz, *J*=8.7 Hz, H<sub>2</sub>), 4.23-4.30 (q, 2H, *J*=7.1 Hz, H<sub>5</sub>), 7.22-7.33 (m, 5H, Ar-H).

**<sup>13</sup>C-NMR (75 MHz; CDCl<sub>3</sub>):** δ 14.1 (C<sub>6</sub>), 23.4 (C<sub>3</sub>), 33.6 (C<sub>2</sub>), 44.8 (C<sub>1</sub>), 62.6 (C<sub>5</sub>), 127.5 (Ar-CH), 128.1 (Ar-CH), 129.4 (Ar-CH), 134.4 (Ar-C), 170.2 (C<sub>4</sub>).

**MS (EI) m/z (relative intensity):** 226/224 (12/37%), 198/196 (6/17), 159 (25), 131 (24), 115 (100).

**HR-MS (ESI):** Found 224.0602, calcd. for C<sub>12</sub>H<sub>13</sub><sup>35</sup>ClO<sub>2</sub>: 224.0604 (1.1 ppm).

### Ethyl 1-iodo-2-phenylcyclopropanecarboxylate

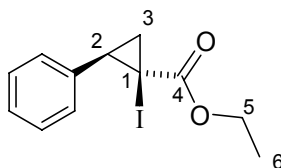

**<sup>1</sup>H-NMR (300 MHz; CDCl<sub>3</sub>):** δ 1.28-1.33 (t, 3H, *J*=7.1 Hz, H<sub>6</sub>), 1.70-1.74 (dd, 1H, *J*=8.7 Hz, *J*=6.0 Hz, H<sub>3β</sub>), 2.25-2.30 (dd, 1H, *J*=10.1 Hz, *J*=6.0 Hz, H<sub>3α</sub>), 2.53-2.58 (dd, 1H, *J*=10.1 Hz, *J*=8.7 Hz, H<sub>2</sub>), 4.18-4.25 (q, 2H, *J*=7.1 Hz, H<sub>5</sub>), 7.16-7.19 (m, 2H, Ar-H), 7.29-7.37 (m, 3H, Ar-H).

**<sup>13</sup>C-NMR (75 MHz; CDCl<sub>3</sub>):** δ 9.5 (C<sub>6</sub>), 14.1 (C<sub>3</sub>), 25.2 (C<sub>2</sub>), 33.1 (C<sub>1</sub>), 63.0 (C<sub>5</sub>), 127.6 (Ar-CH), 128.1 (Ar-CH), 129.3 (Ar-CH), 138.0 (Ar-C), 170.0 (C<sub>4</sub>).

**MS (EI) m/z (relative intensity):** 316 (75%), 270 (6), 160 (26), 133 (17), 115 (100).

**HR-MS (ESI):** Found 315.9926, calcd. for C<sub>12</sub>H<sub>13</sub>IO<sub>2</sub>: 315.9960 (-0.7 ppm).

### Ethyl 1-bromo-2-(naphthalen-3-yl)cyclopropanecarboxylate

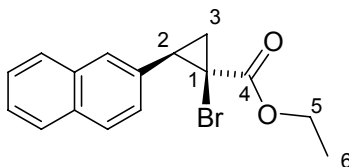

**<sup>1</sup>H-NMR (300 MHz; CDCl<sub>3</sub>):** δ 1.35-1.40 (t, 3H, *J*=7.1 Hz, H<sub>6</sub>), 1.94-1.99 (dd, 1H, *J*=8.7 Hz, *J*=6.1 Hz, H<sub>3β</sub>), 2.29-2.34 (dd, 1H, *J*=10.0 Hz, *J*=6.1 Hz, H<sub>3α</sub>), 3.13-3.19 (dd, 1H, *J*=10.0 Hz, *J*=8.7 Hz, H<sub>2</sub>), 4.28-4.35 (q, 2H, *J*=7.1 Hz, H<sub>5</sub>), 7.39-7.43 (dd, 1H, *J*=1.7 Hz, *J*=8.5 Hz, Ar-H), 7.49-7.52 (m, 2H, Ar-H), 7.72 (br s, 1H, Ar-H), 7.83-7.87 (m, 3H, Ar-H).

**<sup>13</sup>C-NMR (75 MHz; CDCl<sub>3</sub>):** δ 14.0 (C<sub>6</sub>), 23.8 (C<sub>3</sub>), 33.3 (C<sub>2</sub>), 35.3 (C<sub>1</sub>), 62.6 (C<sub>5</sub>), 125.8 (Ar-CH), 126.0 (Ar-CH), 127.3 (Ar-CH), 127.5 (Ar-CH), 127.5 (Ar-CH), 127.6 (Ar-CH), 128.0 (Ar-CH), 132.6 (Ar-C), 132.9 (Ar-C), 133.1 (Ar-C), 169.6 (C<sub>4</sub>).

**MS (EI) m/z (relative intensity):** 320/318 (10/10%, M<sup>+</sup>), 238 (16), 209 (15), 193 (22), 165 (100).

**HR-MS (ESI):** Found 318.0252, calcd. for C<sub>16</sub>H<sub>15</sub><sup>79</sup>BrO<sub>2</sub>: 318.0255 ppm (1.1 ppm).

## Ethyl 2-naphthoate<sup>1</sup>

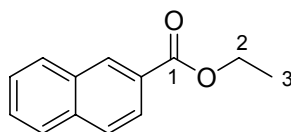

**<sup>1</sup>H-NMR (300 MHz; CDCl<sub>3</sub>):**  $\delta$  1.41-1.46 (t, 3H,  $J=7.1$  Hz, H3), 4.40-4.47 (q, 2H,  $J=7.1$  Hz, H2), 7.50-7.60 (m, 2H, Ar-H), 7.85-7.87 (d, 2H,  $J=8.7$  Hz, Ar-H), 7.93-7.96 (dd, 1H,  $J=7.8$  Hz,  $J=1.2$  Hz, Ar-H), 8.04-8.08 (dd, 1H,  $J=8.7$  Hz,  $J=1.7$  Hz, Ar-H), 8.60 (br s, 1H, Ar-H).

**MS (EI) m/z (relative intensity):** 200 (74%, M<sup>+</sup>), 172 (22), 155 (100), 127 (65).

## Ethyl 1-bromo-2-(1,3-dioxoisindolin-2-yl)cyclopropanecarboxylate

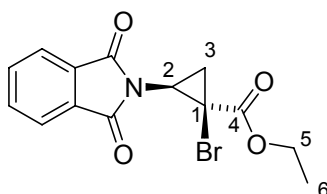

**<sup>1</sup>H-NMR (300 MHz; CDCl<sub>3</sub>):**  $\delta$  1.24-1.29 (t, 3H,  $J=7.1$  Hz, H6), 2.29-2.35 (dd, 1H,  $J=9.6$  Hz,  $J=7.6$  Hz, H3 $\beta$ ), 2.56-2.60 (dd, 1H,  $J=7.6$  Hz,  $J=6.9$  Hz, H3 $\alpha$ ), 3.40-3.46 (dd, 1H,  $J=9.6$  Hz,  $J=6.9$  Hz, H2), 4.17-4.24 (q, 2H,  $J=7.1$  Hz, H5), 7.68-7.72 (m, 2H, Ar-H), 7.77-7.81 (m, 2H, Ar-H).

**<sup>13</sup>C-NMR (75 MHz; CDCl<sub>3</sub>):**  $\delta$  13.9 (C6), 23.3 (C3), 31.9 (C2), 35.4 (C1), 62.9 (C5), 123.4 (Ar-CH), 131.2 (Ar-C), 134.3 (Ar-CH), 168.2 (C4).

**MS (EI) m/z (relative intensity):** (339/337, 13/13%, M<sup>+</sup>), 293/291 (94/94), 258 (57), 184 (77), 104 (91), 76 (100).

**HR-MS (ESI):** Found 336.9952, calcd. for C<sub>14</sub>H<sub>12</sub><sup>79</sup>BrNO<sub>2</sub>: 336.9950 ppm (-0.6 ppm).

### Ethyl 1-bromo-2-(4-methoxyphenyl)cyclopropanecarboxylate

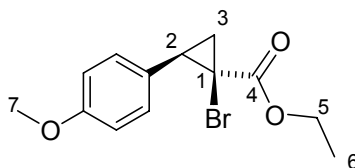

**<sup>1</sup>H-NMR (300 MHz; CDCl<sub>3</sub>):** δ 1.28-1.33 (t, 3H, *J*=7.1 Hz, H<sub>6</sub>), 1.69-1.74 (dd, 1H, *J*=8.7 Hz, *J*=6.0 Hz, H<sub>3β</sub>), 2.14-2.19 (dd, 1H, *J*=10.1 Hz, *J*=6.0 Hz, H<sub>3α</sub>), 2.84-2.90 (dd, 1H, *J*=10.1 Hz, *J*=8.7 Hz, H<sub>2</sub>), 3.77 (s, 3H, H<sub>7</sub>), 4.19-4.27 (q, 2H, *J*=7.1 Hz, H<sub>5</sub>), 6.84-6.88 (m, 2H, Ar-H), 7.11-7.16 (m, 2H, Ar-H).

**<sup>13</sup>C-NMR (75 MHz; CDCl<sub>3</sub>):** δ 14.0 (C<sub>6</sub>), 23.9 (C<sub>3</sub>), 32.6 (C<sub>2</sub>), 35.7 (C<sub>1</sub>), 66.0 (C<sub>7</sub>), 62.5 (C<sub>5</sub>), 113.4 (Ar-CH), 127.6 (Ar-C), 130.3 (Ar-CH), 158.9 (Ar-C), 169.7 (C<sub>4</sub>).

**MS (EI) m/z (relative intensity):** 300/298 (21/21%, M<sup>+</sup>), 271/269 (12/12), 219 (100), 189 (30), 145 (93).

**HR-MS (ESI):** Found 298.0196, calcd. for C<sub>13</sub>H<sub>15</sub><sup>79</sup>BrO<sub>3</sub>: 298.0205 ppm (2.9 ppm).

### Ethyl 1-bromo-2-*p*-tolylcyclopropanecarboxylate

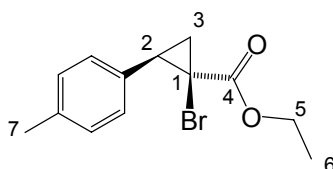

**<sup>1</sup>H-NMR (300 MHz; CDCl<sub>3</sub>):** δ 1.31-1.36 (t, 3H, *J*=7.1 Hz, H<sub>6</sub>), 1.75-1.79 (dd, 1H, *J*=8.7 Hz, *J*=6.0 Hz, H<sub>3β</sub>), 2.17-2.22 (dd, 1H, *J*=10.0 Hz, *J*=6.0 Hz, H<sub>3α</sub>), 2.36 (s, 3H, H<sub>7</sub>), 2.89-2.95 (dd, 1H, *J*=10.0 Hz, *J*=8.7 Hz, H<sub>2</sub>), 4.23-4.30 (q, 2H, *J*=7.1 Hz, H<sub>5</sub>), 7.11-7.18 (m, 4H, Ar-H).

**<sup>13</sup>C-NMR (75 MHz; CDCl<sub>3</sub>):** δ 14.0 (C<sub>6</sub>), 21.0 (C<sub>7</sub>), 23.7 (C<sub>3</sub>), 32.9 (C<sub>2</sub>), 35.4 (C<sub>1</sub>), 62.6 (C<sub>5</sub>), 128.7 (Ar-CH), 129.1 (Ar-CH), 132.5 (Ar-C), 137.1 (Ar-C), 169.7 (C<sub>4</sub>).

**MS (EI) m/z (relative intensity):** 284/282 (45/46%, M<sup>+</sup>), 203 (20), 173 (42), 129 (100), 115 (45).

**HR-MS (ESI):** Found 282.0262, calcd. for C<sub>13</sub>H<sub>15</sub><sup>79</sup>BrO<sub>2</sub>: 282.0255 ppm (-0.7 ppm).

### Ethyl 1-bromo-2-(4-(trifluoromethyl)phenyl)cyclopropanecarboxylat

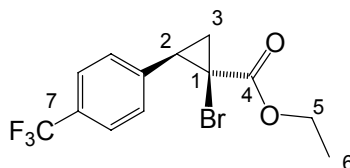

**<sup>1</sup>H-NMR (300 MHz; CDCl<sub>3</sub>):** δ 1.30-1.35 (t, 3H, *J*=7.1 Hz, H<sub>6</sub>), 1.77-1.81 (dd, 1H, *J*=8.4 Hz, *J*=6.2 Hz, H<sub>3β</sub>), 2.21-2.26 (dd, 1H, *J*=10.1 Hz, *J*=6.2 Hz, H<sub>3α</sub>), 2.94-3.00 (m, 1H, H<sub>2</sub>), 4.23-4.29 (q, 2H, *J*=7.1 Hz, H<sub>5</sub>), 7.32-7.34 (m, 2H, Ar-H), 7.57-7.60 (m, 2H, Ar-H).

**<sup>13</sup>C-NMR (75 MHz; CDCl<sub>3</sub>):** δ 14.1 (C<sub>6</sub>), 24.0 (C<sub>3</sub>), 32.6 (C<sub>2</sub>), 34.7 (C<sub>1</sub>), 63.0 (C<sub>5</sub>), 125.0 (q, *J*=3.8 Hz, Ar-CH), 129.2 (Ar-C), 129.8 (Ar-CH), 139.7 (Ar-C), 169.4 (C<sub>4</sub>).

**MS (EI) m/z (relative intensity):** 338/336 (39/40%, M<sup>+</sup>), 310/308 (19/19), 201 (37), 183 (100), 115 (71).

**HR-MS (ESI):** Found 335.9976, calcd. for C<sub>13</sub>H<sub>12</sub><sup>79</sup>BrF<sub>3</sub>O<sub>2</sub>: 335.9973 ppm (-1.0 ppm).

### Ethyl 1-bromo-2,2-diphenylcyclopropanecarboxylate

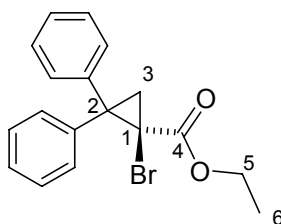

**<sup>1</sup>H-NMR (300 MHz; CDCl<sub>3</sub>):** δ 0.94-0.98 (t, 3H, *J*=7.1 Hz, H<sub>6</sub>), 2.05-2.08 (dd, 1H, *J*=6.5 Hz, *J*=0.8 Hz, H<sub>3β</sub>), 2.80-2.82 (dd, 1H, *J*=6.5 Hz, *J*=0.8 Hz, H<sub>3α</sub>), 3.81-4.03 (m, 2H, H<sub>5</sub>), 7.14-7.53 (m, 10H, Ar-H).

**<sup>13</sup>C-NMR (75 MHz; CDCl<sub>3</sub>):** δ 13.6 (C<sub>6</sub>), 27.6 (C<sub>3</sub>), 39.0 (C<sub>2</sub>), 45.0 (C<sub>1</sub>), 62.2 (C<sub>5</sub>), 127.2 (Ar-CH), 127.3 (Ar-CH), 128.3 (Ar-CH), 128.5 (Ar-CH), 129.4 (Ar-CH), 140.5 (Ar-C), 141.5 (Ar-C), 167.7 (C<sub>4</sub>).

**MS (EI) m/z (relative intensity):** 346/344 (0.3/0.3%, M<sup>+</sup>), 264 (32), 219 (44), 191 (100), 165 (27).

**HR-MS (ESI):** Found 344.0423, calcd. for C<sub>18</sub>H<sub>17</sub><sup>79</sup>BrO<sub>2</sub>: 344.0412 ppm (-3.2 ppm).

## Ethyl 1-bromo-2-(4-chlorophenyl)cyclopropanecarboxylate

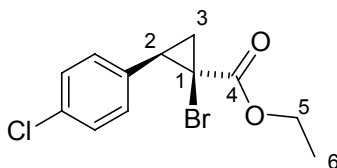

**<sup>1</sup>H-NMR (300 MHz; CDCl<sub>3</sub>):** δ 1.29-1.35 (t, 3H, *J*=7.1 Hz, H<sub>6</sub>), 1.70-1.75 (dd, 1H, *J*=8.6 Hz, *J*=6.1 Hz, H<sub>3β</sub>), 2.16-2.22 (dd, 1H, *J*=10.0 Hz, *J*=6.1 Hz, H<sub>3α</sub>), 2.86-2.92 (dd, 1H, *J*=10.0 Hz, *J*=8.6 Hz, H<sub>2</sub>), 4.21-4.28 (q, 2H, *J*=7.1 Hz, H<sub>5</sub>), 7.13-7.16 (m, 2H, Ar-H), 7.28-7.31 (m, 2H, Ar-H).

**<sup>13</sup>C-NMR (75 MHz; CDCl<sub>3</sub>):** δ 14.1 (C<sub>6</sub>), 24.0 (C<sub>3</sub>), 32.5 (C<sub>2</sub>), 35.0 (C<sub>1</sub>), 62.9 (C<sub>5</sub>), 128.3 (Ar-CH), 130.2 (Ar-CH), 130.7 (Ar-CH), 133.4 (Ar-C), 134.2 (Ar-C), 169.6 (C<sub>4</sub>).

**MS (EI) m/z (relative intensity):** 306/304/302 (10/39/29%, M<sup>+</sup>), 193 (28), 167 (26), 149 (73), 115 (100).

**HR-MS (ESI):** Found 301.9715, calcd. for C<sub>12</sub>H<sub>12</sub><sup>79</sup>Br<sup>35</sup>ClO<sub>2</sub>: 301.9709 ppm (-1.8 ppm).

<sup>1</sup> N. Asao, T. Nogami, S. Lee, and Y. Yamamoto, *Journal of the American Chemical Society*, 2003, **125**, 10921.
